# Supplementary material for: A psychometric analysis of outcome measures in peripheral spondyloarthritis
Source: PubMed Central journal article supplement — Ann Rheum Dis. 2015 Aug 5;75(7):1302–7. doi: 10.1136/annrheumdis-2014-207235 (PMC4941177; doi:10.1136/annrheumdis-2014-207235), 2015-08-05
Supplement: annrheumdis-2014-207235-s1.pdf [file annrheumdis-2014-207235-s1.pdf]

| <b>Supplemental Table S1. Baseline characteristics of the study populations in ABILITY-2 and TIPES – ITT</b> |                          |                          |                        |                         |
|--------------------------------------------------------------------------------------------------------------|--------------------------|--------------------------|------------------------|-------------------------|
| <b>Characteristics</b>                                                                                       | <b>ABILITY-2</b>         |                          | <b>TIPES</b>           |                         |
|                                                                                                              | <b>ADA (N=84)</b>        | <b>PBO(N=81)</b>         | <b>ADA (N=20)</b>      | <b>PBO (N=20)</b>       |
| <b>Demographics</b>                                                                                          |                          |                          |                        |                         |
| Age, years                                                                                                   | 42.5 (10.8)              | 38.5 (12.8)              | 41.5 (12.8)            | 44.4 (11.1)             |
| Disease duration, years                                                                                      | 7.7 (7.9)                | 6.6 (6.3)                | 7.9 (9.3)              | 6.7 (6.2)               |
| Gender (male), n (%)                                                                                         | 36 (42)                  | 39 (48)                  | 9 (45)                 | 12 (60)                 |
| <b>Disease Characteristics</b>                                                                               |                          |                          |                        |                         |
| HLA-B27 positive, n (%)                                                                                      | 56 (67)                  | 44 (56)                  | 11 (55)                | 5 (25)                  |
| IBD (past/present), n (%)                                                                                    | 5 (6)                    | 3 (4)                    | 1 (5)                  | 3 (15)                  |
| PGA , 0-100 mm VAS                                                                                           | 65.2 (15.2)              | 66.4 (15.9)              | 65.8 (18.1)            | 68.4 (17.4)             |
| Patient global pain, 0-100 mm                                                                                | 64.3 (14.0)              | 65.6(15.9)               | 59.6 (21.5)            | 57.9 (16.4)             |
| PhGA , 100 mm VAS                                                                                            | 60.3 (15.5)              | 57.0 (15.0)              | 47.8 (11.8)            | 57.0 (12.6)             |
| ASDAS-CRP 0-10 cm VAS                                                                                        | 2.9 (0.8)                | 3.1 (0.8)                | 2.9 (1.0)              | 3.2 (0.9)               |
| BASDAI, 0-10 cm VAS                                                                                          | 5.7 (1.7)                | 5.6 (1.6)                | 5.5 (2.3)              | 6.0 (1.4)               |
| BASDAI #1                                                                                                    | 6.0 (2.1)                | 5.8 (2.2)                | 5.7 (2.9)              | 6.5 (2.0)               |
| BASDAI #2                                                                                                    | 4.3 (3.1)                | 4.0 (2.8)                | 5.0 (3.3)              | 6.0 (2.9)               |
| BASDAI #3                                                                                                    | 6.6 (2.0)                | 6.7 (1.7)                | 6.3 (2.4)              | 5.9 (2.2)               |
| BASDAI #4                                                                                                    | 6.1 (2.4)                | 5.9 (2.2)                | 5.6 (2.9)              | 5.6 (2.2)               |
| BASDAI #5                                                                                                    | 5.7 (2.6)                | 5.8 (2.3)                | 5.9 (3.0)              | 6.7 (1.9)               |
| BASDAI #6                                                                                                    | 4.9 (2.8)                | 5.2 (2.8)                | 4.1 (3.1)              | 5.1 (3.3)               |
| BASDAI mean #5, #6                                                                                           | 5.3 (2.4)                | 5.5 (2.3)                | 5.0 (2.9)              | 5.9 (2.3)               |
| SJC                                                                                                          | 6.1 (5.6) <sup>a</sup>   | 7.3 (8.0) <sup>a</sup>   | 4.3 (4.2) <sup>b</sup> | 2.5 (1.9) <sup>b</sup>  |
| TJC                                                                                                          | 13.0 (12.8) <sup>c</sup> | 13.6 (16.1) <sup>c</sup> | 9.4 (8.2) <sup>d</sup> | 10.6 (5.9) <sup>d</sup> |
| Enthesitis (past/present), n (%)                                                                             | 48 (57)                  | 57 (70)                  | 13 (65)                | 14 (70)                 |
| Dactylitis (past/present), n (%)                                                                             | 23 (27)                  | 27 (33)                  | 4 (20)                 | 1 (5)                   |
| CRP, mg/l                                                                                                    | 9.7 (17.7)               | 10.7 (15.7)              | 7.8 (13.3)             | 13.5 (26.4)             |
| <b>Concomitant therapies</b>                                                                                 |                          |                          |                        |                         |
| Concomitant NSAIDs, n (%)                                                                                    | 57 (68)                  | 65 (80)                  | 13 (65)                | 14 (70)                 |
| Concomitant DMARD, n (%)                                                                                     | 38 (45)                  | 41 (51)                  | 14 (70)                | 11 (55)                 |
| Concomitant MTX, n (%)                                                                                       | 23 (27)                  | 25 (31)                  | 5 (25)                 | 6 (30)                  |
| Concomitant SSZ, n (%)                                                                                       | 20 (24)                  | 27 (33)                  | 7 (35)                 | 4 (20)                  |

All values are the mean (SD), unless otherwise specified. <sup>†</sup>2 patients missing. ‡5mg/l is upper limit of normal in both trials. #, number; ITT, Intention to treat; ADA, adalimumab; PBO, placebo; HLA-B27, human leukocyte antigen B27; IBD, Inflammatory Bowel Disease; PGA, patient global assessment; PhGA, physician global assessment; VAS, visual analogue scale; ASDAS-CRP, Ankylosing Spondylitis Disease Activity Score based on C-reactive protein; BASDAI, Bath Ankylosing Spondylitis Disease Activity Index; SJC, swollen joint count; TJC, tender joint count; CRP, C-reactive protein; NSAID, nonsteroidal anti-inflammatory drug; DMARD, disease modifying antirheumatic drug; MTX, methotrexate; SSZ, sulfasalazine. <sup>a</sup>SJC 0-76 joints, <sup>b</sup>SJC 0-66 joints, <sup>c</sup>TJC 0-78 joints, <sup>d</sup>TJC 0-68 joints. For TIPES, patient global pain was derived from the mean of BASDAI #3 and #4.
